# Supplementary material for: Is more evidence needed for thrombectomy in basilar artery occlusion? The BASICS and BEST meta-analytical approaches
Source: HighWire-hosted journal article supplement (doi:10.1136/svn-2020-000701), 2021-05-03
Supplement: svn-2020-000701supp001_data_supplement.pdf [file svn-2020-000701supp001_data_supplement.pdf]

## SUPPLEMENTAL MATERIAL

### Supplemental Methods (model information [LaTeX])

Gaussian Prior on Log Odds-Ratio based on HERMES <sup>1</sup>, with  $\mu \sim \log(2.25)$  and  $\sigma^2$  accounting for the null effect ( $\exp(x) \sim 1$ ) at quantile  $p = 0.025$ :

$$\text{Prioreffect} \sim N(0.8191, 0.414)$$

Odds-ratio ( $\exp(x)$ ) on Quantiles  $p = \{0.025, 0.50, 0.975\}$  of prior:

$$Q = \{0.000, 0.8109, 1.62\}, \exp(Q) = \{1.00, 2.25, 5.06\}$$

Heterogeneity prior <sup>2</sup>:

$$\text{Prior } \tau \sim \text{HalfNormal}(0.5)$$

### Supplemental Table

Supplemental Table 1. BEST and BASICS trials sample characteristics

|                                                           | BEST trial        |              | BASICS trial       |               |
|-----------------------------------------------------------|-------------------|--------------|--------------------|---------------|
|                                                           | Intervention (66) | Control (65) | Intervention (154) | Control (146) |
| Age (median and quartiles or mean and standard deviation) | 62 (50 - 74)      | 68 (57 - 74) | 67 (13.1)          | 67 (11.9)     |
| Female sex                                                | 18 (27%)          | 13 (20%)     | 54 (35)            | 50 (34)       |
| Hypertension                                              | 45 (68%)          | 42 (65%)     | 92 (61)            | 82 (57)       |
| Diabetes                                                  | 10 (15%)          | 11 (17%)     | 33 (22)            | 31 (21)       |
| Previous stroke                                           | 14 (21%)          | 20 (31%)     | 26 (17)            | 26 (18)       |
| Atrial fibrillation                                       | 18 (27%)          | 10 (15%)     | 44 (29)            | 22 (15)       |
| NIHSS score (median and quartiles)                        | 32 (18 - 38)      | 26 (13 - 37) | 21                 | 22            |
| Intravenous thrombolysis                                  | 18 (27%)          | 21 (32%)     | 121 (79)           | 116 (80)      |

### Supplemental Figures

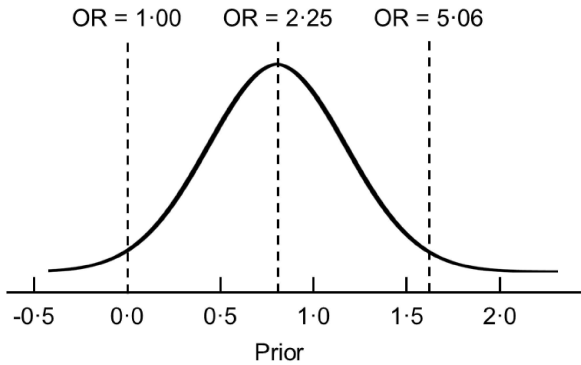

Supplemental Figure 1. Prior distribution

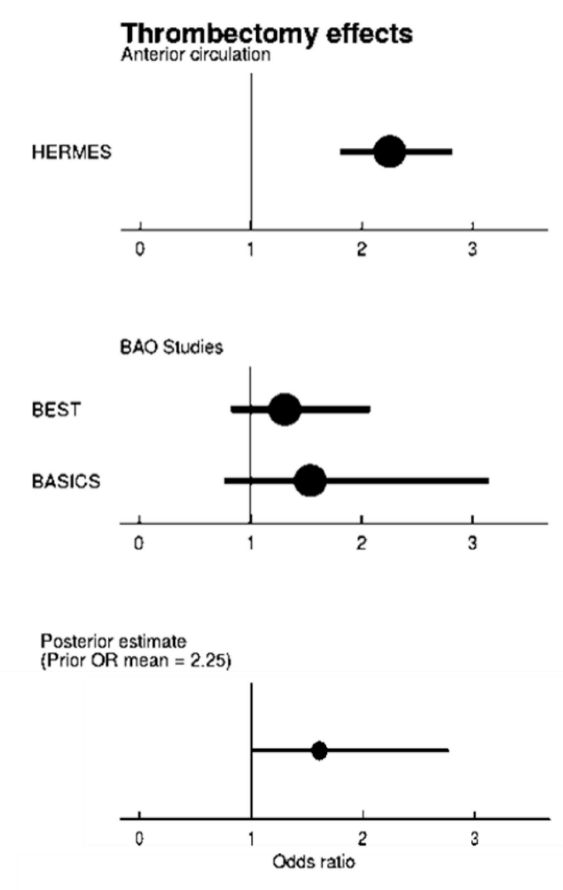

Supplemental Figure 2. Posterior estimate

References

1. Goyal M, Menon BK, van Zwam WH, et al. Endovascular thrombectomy after large-vessel ischaemic stroke: a meta-analysis of individual patient data from five randomised trials. *Lancet* 2016;387(10029):1723–31.
2. Friede T, Röver C, Wandel S, Neuenschwander B (2017a). “Meta-Analysis of Few Small Studies in Orphan Diseases.” *Research Synthesis Methods*, 8(1), 79–91. doi:10.1002/jrsm.1217.
